# Supplementary material
Source: PubMed Central journal article supplement (PMC6581594)
Supplement: NIHMS1527949-supplement-1.pdf [file NIHMS1527949-supplement-1.pdf]

### A. PQR mutation

CTA and TTA both encode Leucine.

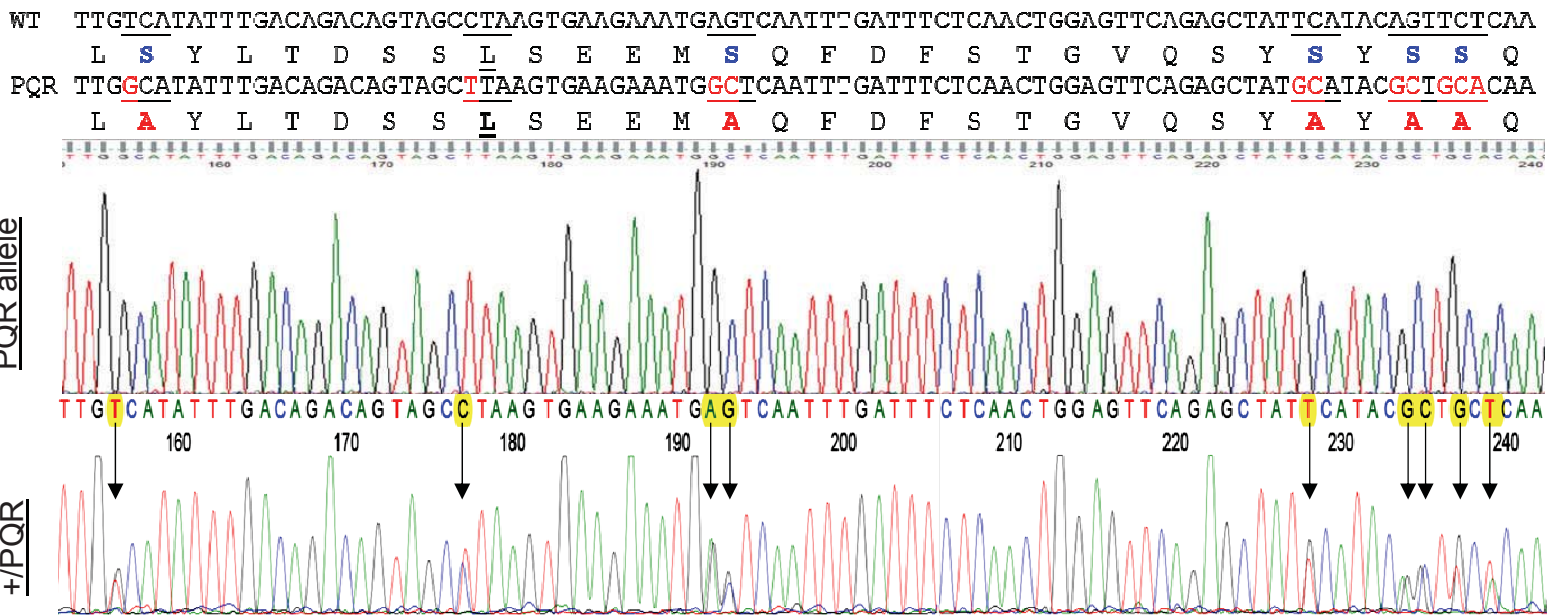

### B. s2053D mutation

WT-TATTCATACAGTTCTCAAGAT  
 Y S Y S S Q D

SD-TATTCATAC**TCTGAT**CAAGAT  
 Y S Y S **D** Q D  
 TATTCATAC**TCTGAT**CAAGAT

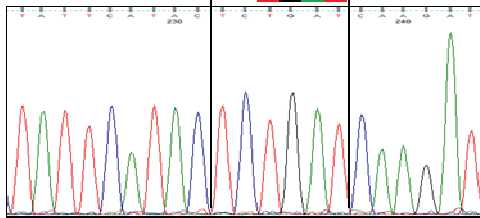

### C.

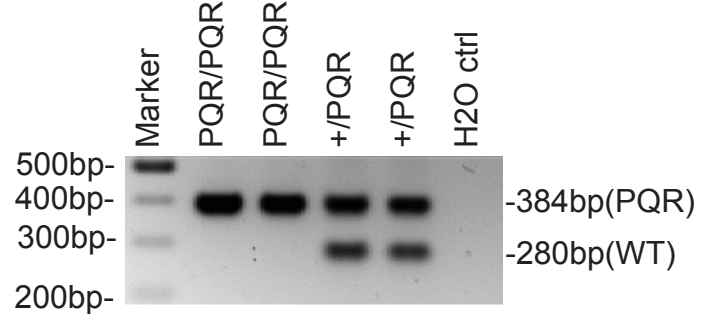

### D.

| DNA-PKcs Genotype | n= | Weight(g) |
|-------------------|----|-----------|
| +/+               | 9  | 22.3±3.0  |
| PQR/PQR           | 9  | 25.3±3.9  |
| PQR/-             | 2  | 22.9±1.4  |
| SD/SD             | 9  | 21.5±3.4  |
| +/SD              | 3  | 22.2±1.9  |

### E.

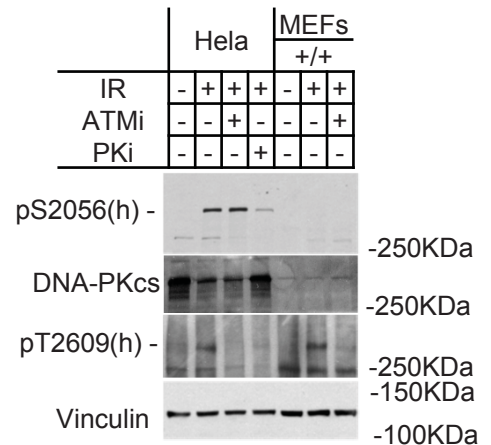

**Supplementary Figure 1:** The alignment of genomic and predicted protein sequence of the *DNA-PKcs*<sup>PQR</sup> (A) and *DNA-PKcs*<sup>SD</sup> (B) allele from homozygous *DNA-PKcs*<sup>PQR/PQR</sup>, *DNA-PKcs*<sup>SD/SD</sup> mice. The synonymous substitution (CTA→TTA) generates a new restriction site (CTTAAG) for Afill, which was used for screening. (C) A set of representative genotyping results from crosses between *DNA-PKcs*<sup>PQR/+</sup> parents. The PCR products corresponding to the WT allele is 280bp, to PQR is 387bp. (D) The body weight of adult *DNA-PKcs*<sup>PQR/PQR</sup>, *DNA-PKcs*<sup>PQR/-</sup> (compound heterozygous with null), *DNA-PKcs*<sup>+/SD</sup> *DNA-PKcs*<sup>SD/SD</sup> mice (average± standard error). Based on student t test, there is no significant difference between any two genotype groups. (E) Western blotting using commercial antibodies developed against pS2056 of human DNA-PKcs (Bethyl Laboratories Inc., BL2423, 1:500)

A.

| At 8-10 week | Weight (mg) |             | Count ( $10^6$ ) |           |
|--------------|-------------|-------------|------------------|-----------|
|              | Thymus      | Spleen      | Thymus           | Spleen    |
| WT (n=3)     | 38.90±11.24 | 95.93±3.56  | 68.5±33.2        | 64.8±18.8 |
| PQR/PQR(n=3) | 34.33±9.72  | 80.07±13.15 | 58.57±11.9       | 52.2±14.9 |
| PQR/- (n=3)  | 41.25±6.45  | 92.50±35.6  | 61.5±11.3        | 64.5±35.6 |

B.

| At 4 week   | Count ( $10^6$ ) |           |
|-------------|------------------|-----------|
|             | Thymus           | Spleen    |
| WT (n=4)    | 173.4±34.3       | 65.9±9.8  |
| SD/SD(n=11) | 127.8±46.9       | 59.8±19.7 |
| +/SD (n=3)  | 160.8±35.4       | 56.9±19.9 |

C.

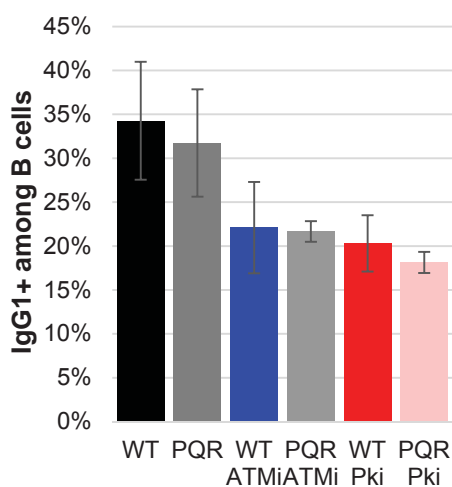

D.

| ATM  |       | -/- | +/- | +/+ | p    |
|------|-------|-----|-----|-----|------|
| PKCs | SD/SD | 5   | 11  | 6   | >0.9 |
|      | +/+   | 26  | 57  | 32  |      |

E.

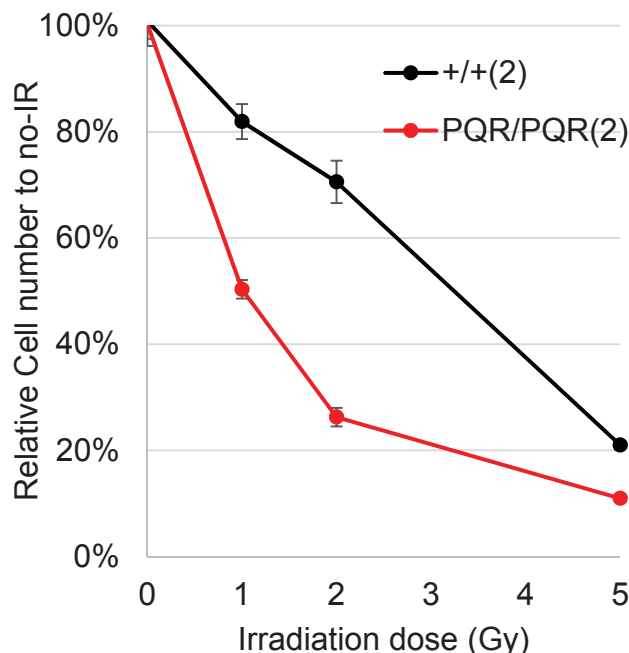

### Supplementary Figure 2

(A) Thymus and Spleen weight (g) and total cellularity in *DNA-PKCs<sup>PQR/PQR</sup>* and control mice. (B) Total cell count of thymus and spleen from *DNA-PKCs<sup>SD/SD</sup>* and *DNA-PKCs<sup>+/+</sup>* littermates. The data represents the average and standard deviation of >3 mice of each genotype. (C) The percentage of IgG1+ cells among all B220+ B cells at day 4 of class switch. The data represents the average and standard deviation of 3 independent experiments. ATM inhibitor KU55933 was used at final concentration of 7.5µM and DNA-PKCs inhibitor NU7441 was used at a final concentration of 2.5 µM. (D) The distribution of ATM genotyping from breeding between *DNA-PKCs<sup>SD/SD</sup>ATM<sup>+/-</sup>* parents. The breeding between *ATM<sup>+/-</sup>* mice were used as control. P was calculated using the Fisher exact test. (E) The independent repeats of radiation sensitivity of B cells activated for class switch recombination. The activated B cells were irradiated on the day of purification and cytokine stimulation (anti-CD40 and IL4) and the cell counts were determined 4 days later.

SupTable 1

|    | CODINGJOINTs_-LEFT             | P  | N        | P   | RIGHT                          | N+P= | Del= |
|----|--------------------------------|----|----------|-----|--------------------------------|------|------|
| GL | AAGCGGAGCACCACAGTGCTAACTGGGACC |    |          |     | ACTATGCTATGGACTACTGGGGTCAAGGAA |      |      |
| 1  | AAGCGGAGCACCACAGTGCTAACTGG     |    |          |     | CTATGGACTACTGGGGTCAAGGAA       | 0    | 10   |
| 2  | AAGCGGAGCACCACAGTGCTAACTGGGA   |    |          |     | TGCTATGGACTACTGGGGTCAAGGAA     | 0    | 6    |
| 3  | AAGCGGAGCACCACAGTGCTAACTG      |    |          |     | TGCTATGGACTACTGGGGTCAAGGAA     | 0    | 9    |
| 4  | AAGCGGAGCACCACAGTGCTAACTGGG    |    |          | T   | ACTATGCTATGGACTACTGGGGTCAAGGAA | 1    | 3    |
| 5  | AAGCGGAGCACCACAGTGCTAACTGGGA   |    | CG       |     | TGCTATGGACTACTGGGGTCAAGGAA     | 2    | 6    |
| 6  | AAGCGGAGCACCACAGTGCTAACTGGGACC | GG |          |     | ATGCTATGGACTACTGGGGTCAAGGAA    | 2    | 3    |
| 7  | AAGCGGAGCACCACAGTGCTAACTGGGA   |    | GGG      |     | ACTATGCTATGGACTACTGGGGTCAAGGAA | 3    | 2    |
| 8  | AAGCGGAGCACCACAGTGCT           |    | CCA      |     | ACTATGCTATGGACTACTGGGGTCAAGGAA | 3    | 11   |
| 9  | AAGCGGAGCACCACAGTGCT           |    | CCG      |     | TATGGACTACTGGGGTCAAGGAA        | 3    | 17   |
| 10 | AAGCGGAGCACCACAGTGCTAACTGGGACC |    | CC       | T   | ACTATGCTATGGACTACTGGGGTCAAGGAA | 3    | 0    |
| 11 | AAGCGGAGCACCACAGTGCTAACTGGGAC  | G  | GG       |     | TGCTATGGACTACTGGGGTCAAGGAA     | 3    | 5    |
| 12 | AAGCGGAGCACCACAGTGCTAACTG      |    | AGGG     |     | ATGCTATGGACTACTGGGGTCAAGGAA    | 4    | 8    |
| 13 | AAGCGGAGCACCACAGTGCTAACTGGGA   |    | AACG     |     | ATGCTATGGACTACTGGGGTCAAGGAA    | 4    | 5    |
| 14 | AAGCGGAGCACCACAGTGCTAACTG      |    | AGGG     |     | ATGCTATGGACTACTGGGGTCAAGGAA    | 4    | 8    |
| 15 | AAGCGGAGCACCACAGTG             |    | TCTT     |     | TATGGACTACTGGGGTCAAGGAA        | 4    | 19   |
| 16 | AAGCGGAGCACCACAGTGCTAACTGGGA   |    | GTTT     |     | TATGCTATGGACTACTGGGGTCAAGGAA   | 5    | 4    |
| 17 | AAGCGGAGCACCACAGTGCTAACTGGGAC  | GT | GGT      |     | CTATGCTATGGACTACTGGGGTCAAGGAA  | 5    | 2    |
| 18 | AAGCGGAGCACCACAGTGCTAACTG      |    | ACCCT    | TCC | GGACTACTGGGGTCAAGGAA           | 8    | 15   |
| 19 | AAGCGGAGCACCA                  |    | GACGGAGA |     | CTATGGACTACTGGGGTCAAGGAA       | 8    | 23   |
| 1  | AAGCGGAGCACCACAGTGCTAACTGGGAC  |    | T        |     | TGCTATGGACTACTGGGGTCAAGGAA     | 1    | 5    |
| 2  | AAGCGGAGCACCACAGTGCTAACTG      |    | TT       |     | CTATGCTATGGACTACTGGGGTCAAGGAA  | 2    | 6    |
| 3  | AAGCGGAGCACCACAGTGCTAACTGGGA   |    | AGG      |     | TGCTATGGACTACTGGGGTCAAGGAA     | 3    | 6    |
| 4  | AAGCGGAGCACCACAGTGCTAACTGGG    |    | TC       | T   | ACTATGCTATGGACTACTGGGGTCAAGGAA | 3    | 3    |
| 5  | AAGCGGAGCACCACAGTGCTAACTGGGAC  | G  | GG       |     | GGACTACTGGGGTCAAGGAA           | 3    | 11   |
| 6  | AAGCGGAGCACCACAGTGCTAACTGGGAC  | GT | A        |     | ACTATGCTATGGACTACTGGGGTCAAGGAA | 3    | 1    |
| 7  | AAGCGGAGCACCACAGTGCTAACTGGGAC  | G  | AA       | T   | ACTATGCTATGGACTACTGGGGTCAAGGAA | 4    | 1    |
| 8  | AAGCGGAGCACCACAGTGCTAACTGGGAC  | GT |          | AG  | CTATGCTATGGACTACTGGGGTCAAGGAA  | 4    | 2    |
| 9  | AAGCGGAGCACCACAGTGCTAACTGGGAC  | G  | GGA      |     | CTATGCTATGGACTACTGGGGTCAAGGAA  | 4    | 2    |
| 10 | AAGCGGAGCACCACAGTGCTAACTGGGAC  | G  | GGG      |     | GCTATGGACTACTGGGGTCAAGGAA      | 4    | 6    |
| 11 | AAGCGGAGCACCACAGTGCTAACT       |    | CTATT    |     | ACTATGCTATGGACTACTGGGGTCAAGGAA | 5    | 6    |
| 12 | AAGCGGAGCACCACAGTGCTAACTGGGAC  | G  | GG       | GT  | ACTATGCTATGGACTACTGGGGTCAAGGAA | 5    | 1    |
| 13 | AAGCGGAGCACCACAGTGCTAACTGGG    |    | GCCCT    |     | CTATGCTATGGACTACTGGGGTCAAGGAA  | 5    | 4    |
| 14 | AAGCGGAGCACCACAGTGCTAACTGGGAC  | GT | AGGG     |     | GCTATGGACTACTGGGGTCAAGGAA      | 6    | 6    |
| 15 | AAGCGGAGCACCACAGTGCTAACTGGGAC  | G  | ATAT     | T   | ACTATGCTATGGACTACTGGGGTCAAGGAA | 6    | 1    |
| 16 | AAGCGGAGCACCACAGTGCTA          | T  | CGGGAG   |     | GCTATGGACTACTGGGGTCAAGGAA      | 7    | 14   |

**SupTable 1** Endogenous DQ52-JH4 junctions from peripheral B cells in *DNA-PKcs<sup>+/+</sup>* (n=19) and *DNA-PKcs<sup>PQR/PQR</sup>* (n=16) B cells mice. GL= Germline line sequence; P=palindromic (p) nucleotides; N=nontemplate-encoded nucleotides. Del=deletion, from the predicated GL seq.

SupTable 2

|    | CODING JOINTs_ - LEFT          | P  | N        | P  | RIGHT                          | N+P= | Del= |
|----|--------------------------------|----|----------|----|--------------------------------|------|------|
| GL | AAGCGGAGCACCACAGTGCTAACTGGGACC |    |          |    | ACTATGCTATGGACTACTGGGGTCAAGGAA |      |      |
| 1  | AAGCGGAGCACCACAGTGCTAACTGGGACC | GG | G        |    | GCTATGGACTACTGGGGTCAAGGAA      | 3    | 5    |
| 2  | AAGCGGAGCACCACAGTGCTAACTGGGACC |    |          |    | TGCTATGGACTACTGGGGTCAAGGAA     | 0    | 5    |
| 3  | AAGCGGAGCACCACAGTGCTAACTGGGACC |    |          |    | TATGCTATGGACTACTGGGGTCAAGGAA   | 0    | 3    |
| 4  | AAGCGGAGCACCACAGTGCTAACTGGGACC | G  | GT       |    | TATGCTATGGACTACTGGGGTCAAGGAA   | 3    | 3    |
| 5  | AAGCGGAGCACCACAGTGCTAACTGGGACC | G  | A        |    | GCTATGGACTACTGGGGTCAAGGAA      | 2    | 6    |
| 6  | AAGCGGAGCACCACAGTGCTAACTGGGACC | G  |          | GC | GCTATGGACTACTGGGGTCAAGGAA      | 3    | 6    |
| 7  | AAGCGGAGCACCACAGTGCTAACTGGGACC | G  | AGG      |    | GCTATGGACTACTGGGGTCAAGGAA      | 4    | 6    |
| 8  | AAGCGGAGCACCACAGTGCTAACTGGGACC | G  | AC       |    | CTATGCTATGGACTACTGGGGTCAAGGAA  | 3    | 2    |
| 9  | AAGCGGAGCACCACAGTGCTAACTGGGACC | G  | GGACTTA  |    | ATGGACTACTGGGGTCAAGGAA         | 8    | 9    |
| 10 | AAGCGGAGCACCACAGTGCTAACTGGGACC | G  | GGAT     | T  | ACTATGCTATGGACTACTGGGGTCAAGGAA | 6    | 1    |
| 11 | AAGCGGAGCACCACAGTGCTAACTGGGA   |    | GGGAGAGT | G  | CTATGCTATGGACTACTGGGGTCAAGGAA  | 9    | 3    |
| 12 | AAGCGGAGCACCACAGTGCTAACTGGG    |    | GGGGTGC  |    | TGGACTACTGGGGTCAAGGAA          | 8    | 12   |
| 13 | AAGCGGAGCACCACAGTGCTAACTGGG    | CC | TC       |    | CTATGCTATGGACTACTGGGGTCAAGGAA  | 4    | 4    |
| 14 | AAGCGGAGCACCACAGTGCTAACTGGG    |    | TC       |    | ATGCTATGGACTACTGGGGTCAAGGAA    | 2    | 6    |
| 15 | AAGCGGAGCACCACAGTGCTAACTGGG    |    |          |    | ACTGGGGTCAAGGAA                | 0    | 18   |
| 16 | AAGCGGAGCACCACAGTGCTAACTGGG    |    |          | T  | ACTATGCTATGGACTACTGGGGTCAAGGAA | 1    | 3    |
| 17 | AAGCGGAGCACCACAGTGCTAACTGG     |    |          |    | TATGCTATGGACTACTGGGGTCAAGGAA   | 0    | 6    |
| 18 | AAGCGGAGCACCACAGTGCTAACTG      |    | T        | T  | ACTATGCTATGGACTACTGGGGTCAAGGAA | 2    | 5    |
| 19 | AAGCGGAGCACCACAGTGCTAACT       |    | CCCT     | T  | ACTATGCTATGGACTACTGGGGTCAAGGAA | 5    | 6    |
| 20 | AAGCGGAGCACCACAGT              | A  | TGAGGAT  | T  | ACTATGCTATGGACTACTGGGGTCAAGGAA | 9    | 13   |

**Supplementary Table 2**

Endogenous DQ52-JH4 junctions (n=20) from peripheral *DNA-PKcs<sup>SD/SD</sup> B cells*. GL= Germline line sequence; P=palindromic (p) nucleotides; N=non-template-encoded nucleotides. Del=deletion, indicating base pair deletion from the predicated GL seq.
